# Supplementary material
Source: Springer Nature journal article supplement (https://www.springermedizin.de/resource/supplementary/12913_2012_2251_MOESM4_ESM.pdf/9530064)

## Males

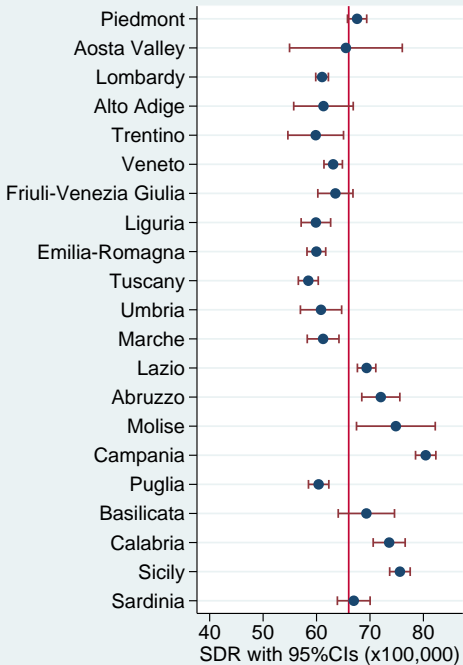

## Females

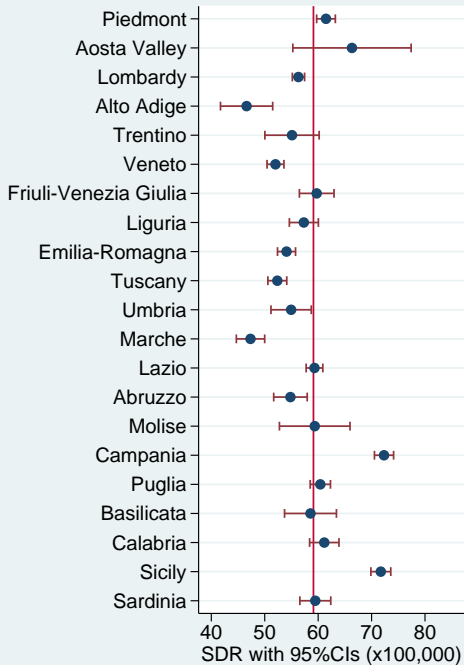

Supplement: MOESM4 [file 9530064]
